# Supplementary material for: Immobilizing CsPbBr3 perovskite nanocrystals on nanoporous carbon powder for visible-light-driven CO2 photoreduction
Source: Royal Society of Chemistry journal article supplement (doi:10.1039/d1dt03099j), 2021-01-01
Supplement: d1dt03099j1.pdf [file d1dt03099j1.pdf]

## Supporting Information

### **Immobilizing CsPbBr<sub>3</sub> perovskite nanocrystals on nanoporous carbon powder for visible-light-driven CO<sub>2</sub> photoreduction**

Ying Jiang, Cunxin Mei, Zhijie Zhang,\* Zhongliang Dong

School of Materials Science and Engineering, Shanghai Institute of Technology, 100 Haiquan Road,

Shanghai, 201418, P. R. China

\*Corresponding author. *Email address:* [zjzhang@sit.edu.cn](mailto:zjzhang@sit.edu.cn) (Z. J. Zhang)

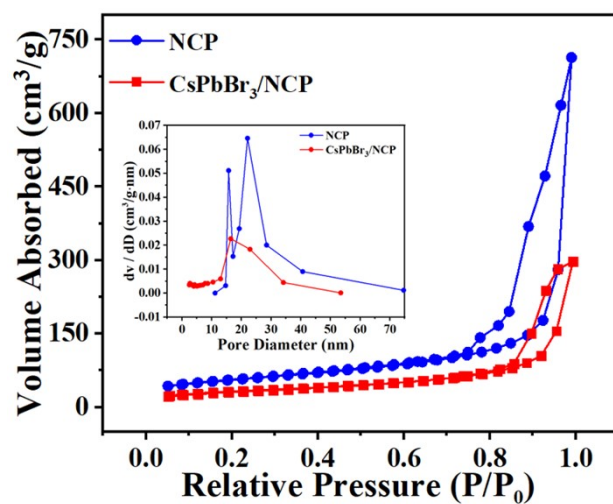

**Fig. S1** N<sub>2</sub> adsorption-desorption isotherms of NCP and the CsPbBr<sub>3</sub>/NCP hybrid. Inset: pore size distribution of the samples.

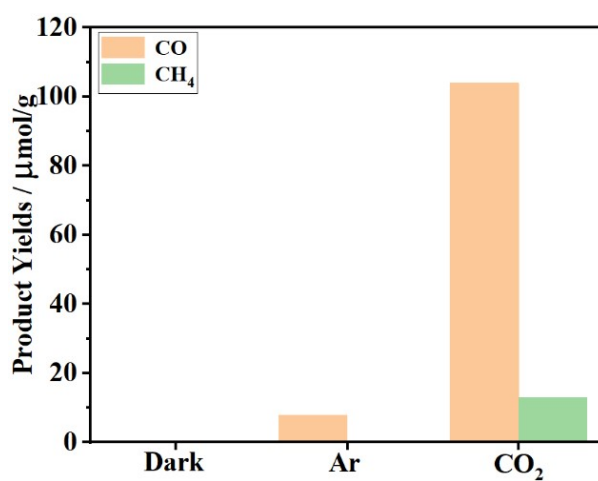

**Fig. S2** Control photocatalytic experiments using CsPbBr<sub>3</sub>/NCP as catalysts under different conditions: with CO<sub>2</sub> under dark condition; with Ar under light irradiation; and with CO<sub>2</sub> under light irradiation.

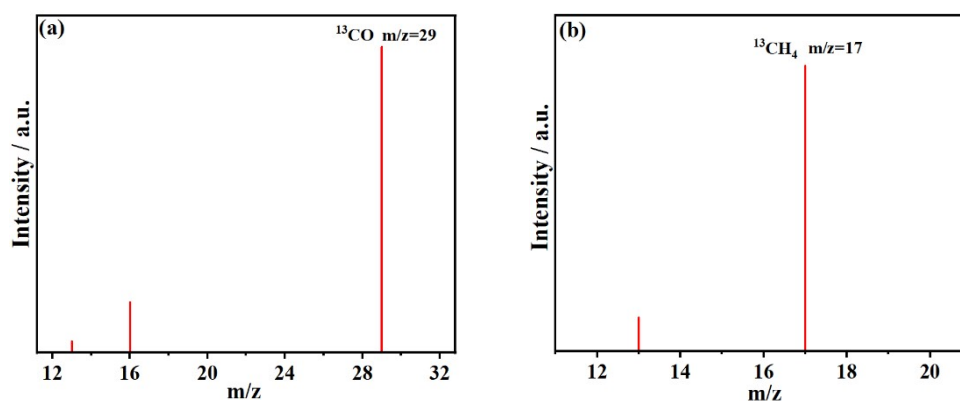

**Fig. S3** Mass spectra showing  $^{13}\text{CO}$  ( $m/z=29$ ) and  $^{13}\text{CH}_4$  ( $m/z=17$ ) produced over  $\text{CsPbBr}_3/\text{NCP}$  in the photocatalytic reduction of  $^{13}\text{CO}_2$ .

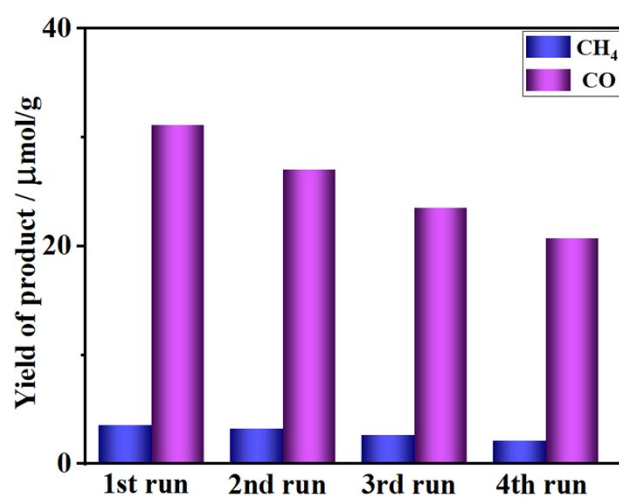

**Fig. S4** Photocatalytic durability test on pristine  $\text{CsPbBr}_3$  NCs with four 4 h cycle.

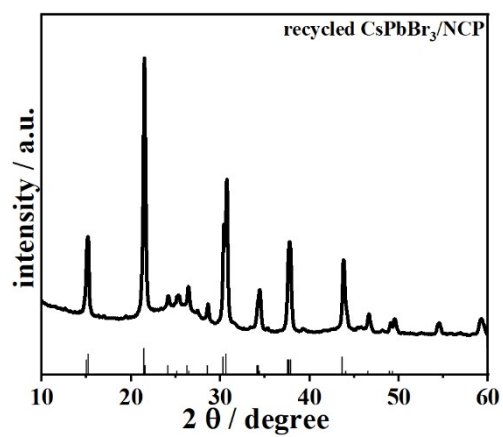

**Fig. S5** XRD pattern of the post-reaction CsPbBr<sub>3</sub>/NCP hybrid.

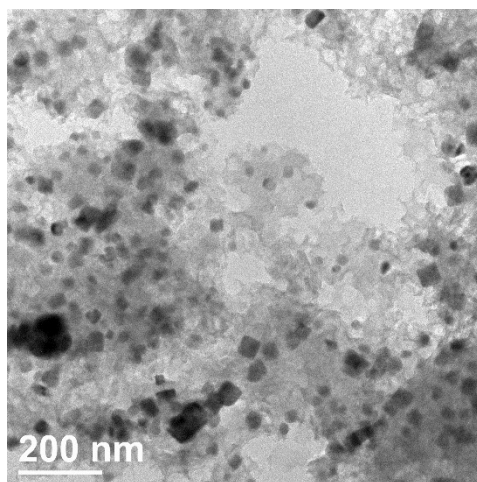

**Fig. S6** TEM image of the post-reaction CsPbBr<sub>3</sub>/NCP hybrid.
